# Supplementary material for: Role of CD133 Molecule in Wnt Response and Renal Repair
Source: PubMed Central journal article supplement — Stem Cells Transl Med. 2018 Feb 12;7(3):283–94. doi: 10.1002/sctm.17-0158 (PMC5827750; doi:10.1002/sctm.17-0158), 2018-02-12
Supplement: SCT3-7-283-s004.pdf [file SCT3-7-283-s004.pdf]

## ROLE OF CD133 MOLECULE IN WNT RESPONSE AND RENAL REPAIR

Alessia Brossa<sup>1\*</sup>, Elli Papadimitriou<sup>1\*</sup>, Federica Collino, Danny Incarnato<sup>3,4</sup>, Salvatore Oliviero<sup>3,4</sup>, Giovanni Camussi<sup>2</sup> and Benedetta Bussolati<sup>1</sup>

<sup>1</sup>Department of Biotechnology and Health Sciences, Molecular Biotechnology Center, University of Turin, Via Nizza 52, 10126 Torino Italy

<sup>2</sup>Department of Medical Sciences; University of Turin, Cso Dogliotti 14, 10126 Torino Italy.

<sup>3</sup> Italian Institute for Genomic Medicine (IIGM), Via Nizza 52, 10126 Torino, Italy.

<sup>4</sup> Dipartimento di Scienze della Vita e Biologia dei Sistemi, University of Turin, Via Accademia Albertina, 13, Torino, Italy.

**Running title:** Role of CD133 in renal tubular cells.

**Correspondence:** Benedetta Bussolati, Molecular Biotechnology Centre, University of Torino, via Nizza 52, 10126 Torino, Italy. Tel. 011-6706453, Fax. 011-6631184, e-mail: [benedetta.bussolati@unito.it](mailto:benedetta.bussolati@unito.it).

## **Supplementary Materials and Methods.**

### **Sorting and labeling of CD133<sup>+</sup> and CD133<sup>-</sup> RPCs.**

To recover CD133<sup>+</sup> and CD133<sup>-</sup> cells, the single cell suspension of RPCs (passage #4) underwent magnetic separation for CD133 (Mylteni, CD133 Cell Isolation Kit, containing the anti-CD133/1 mAb, clone AC133). CD133<sup>+</sup> and CD133<sup>-</sup> cells were re-suspended in DMEM (LONZA) without serum at a concentration of 10<sup>6</sup> viable cells/ml, and stained with DIO- or DIL-Vybrant cell-labeling solutions (Molecular Probes) respectively, according to manufacturer's instructions. DIO- and DIL- labeled RPCs were then mixed in the proportion of 88% DIO-CD133<sup>+</sup> and 12% DIL-CD133<sup>-</sup> RPCs (corresponding to the proportion observed in the unfractionated RPCs population). Cells were then plated in expansion medium (Endothelial Basal Medium (EBM) plus supplement kit; CambrexBioScience) at density 1\*10<sup>4</sup> and subjected to cisplatin damage. The percentage of DIO-CD133<sup>+</sup> and DIL-CD133<sup>-</sup> RPCs was evaluated by cytofluorimetric analysis both in basal conditions and 48h and one week after cisplatin-treatment. Labeled cells were also maintained in single culture and CD133 expression was analyzed at the indicated time points.

**Supplementary Table I.** Primers used in the study.

| <b>Gene ID</b>    | <b>Forward primer</b>                                      | <b>Reverse primer</b>                                      |
|-------------------|------------------------------------------------------------|------------------------------------------------------------|
| <b>GAPDH</b>      | 5'-TGG AAG GAC TCA TGA CCA CAG T-3'                        | 5'-CAT CAC GCC ACA GTT TCC C-3'                            |
| <b>CD133</b>      | 5'-CCA TGG CAA CAG CGA TCA -3'                             | 5'-GGC TAG TTT TCA CGC TGG TCA -3'                         |
| <b>PAX2</b>       | 5'-ATG GAT ATG CAC TGC AAA GCA GA-3'                       | 5'-CTA GTG GCG GTC ATA GGC AG-3'                           |
| <b>VCAM1</b>      | 5'-GGC AGA GTA CGC AAA CAC TTT ATG-3'                      | 5'-AAA GCC CTG GCT CAA GCA T-3'                            |
| <b>FOXD1</b>      | 5'-ACC CTC AGC ACT GAG ATG TC-3'                           | 5'-CCA CGT CGA TGT CTG TTT CC-3'                           |
| <b>SOX9</b>       | 5'-CAA GCT CTG GAG ACT TCT GAA CG-3'                       | 5'-AGA TGT GCG TCT GCT CCG T-3'                            |
| <b>Wnt4</b>       | 5'- CTC ATG AAC CTC CAC AAC AAT GAG-3'                     | 5'-CTC GCC AGC ACG TCT TTA CC- 3'                          |
| <b>36B4</b>       | 5'-CAG CAA GTG GGA AGG TGT AAT CC- 3'                      | 5'-CCC ATT CTA TCA TCA ACG GGT ACA A - 3'                  |
|                   | <b>Tel1</b>                                                | <b>Tel2</b>                                                |
| <b>Telomerase</b> | 5'-CGG TTT GTT TGG GTT TGG GTT TGG GTT TGG GTT TGG GTT- 3' | 5'-GGC TTG CCT TAC CCT TAC CCT TAC CCT TAC CCT TAC CCT- 3' |

**Supplementary Table II. Differential gene modulation in CD133-Kd cells.** List of the genes differentially modulated by cisplatin treatment in shPROM1/2 cells vs GFP cells (Fold change:  $\log_2(\text{CIS shPROM1/2} / \text{CIS GFP}) \leq -1$  or  $\geq 1$ ) ordered as ascending values. Fold change between control cisplatin treated and untreated cells (CIS GFP vs GFP) and CD133-Kd treated and untreated cells (shPROM1/2 CIS vs shPROM1/2) are also reported in the first columns.

| Symbol         | Gene name                                                       | CIS vs CTR Fold change |        | Difference in shPROM vs GFP |
|----------------|-----------------------------------------------------------------|------------------------|--------|-----------------------------|
|                |                                                                 | GFP                    | shPROM |                             |
| SGK3           | serum/glucocorticoid regulated kinase family member 3           | -1.75                  | -13.31 | -11.59                      |
| PROM1          | Prominin 1                                                      | -1.01                  | -1.54  | -1.91                       |
| WNT7A          | Wnt family member 7A                                            | -1.42                  | -2.06  | -1.89                       |
| RAD51B         | RAD51 paralog B                                                 | -1.43                  | -2.80  | -1.66                       |
| C3orf67        | chromosome 3 open reading frame 67                              | -1.59                  | -3.15  | -1.26                       |
| COL6A3         | collagen type VI alpha 3 chain                                  | -1.77                  | -1.11  | -1.13                       |
| ZNF438         | Zinc finger protein 438                                         | -2.03                  | -2.92  | -1.10                       |
| GLI3           | GLI family zinc finger 3                                        | -3.76                  | -4.16  | -1.07                       |
| MIPOL1         | mirror-image polydactyly 1                                      | -1.96                  | -3.53  | -1.05                       |
| RPL36A-HNRNPH2 | RPL36A-HNRNPH2 readthrough                                      | 1.03                   | -0.25  | -1.04                       |
| PRKAR2B        | protein kinase cAMP-dependent type II regulatory subunit beta   | -1.19                  | -1.29  | -1.01                       |
| CCDC8          | coiled-coil domain containing 8                                 | -1.12                  | -0.70  | 1.02                        |
| NCRNA00185     | TTY14 testis-specific transcript, Y-linked 14                   | -1.35                  | -0.75  | 1.04                        |
| AHRR           | aryl-hydrocarbon receptor repressor                             | -1.94                  | -0.27  | 1.06                        |
| HECW1          | HECT, C2 and WW domain containing E3 ubiquitin protein ligase 1 | -3.33                  | -2.55  | 1.07                        |
| ANKMY1         | ankyrin repeat and MYND domain containing 1                     | -1.71                  | -0.23  | 1.08                        |
| PELI2          | pellino E3 ubiquitin protein ligase family member 2             | -2.99                  | -1.69  | 1.08                        |
| MGC23284       | SNAI3-AS1 SNAI3 antisense RNA 1                                 | -1.38                  | 0.19   | 1.09                        |
| MILR1          | Mast cell immunoglobulin like receptor 1                        | -1.29                  | 0.48   | 1.12                        |
| POLE2          | DNA polymerase epsilon 2, accessory subunit                     | -2.41                  | -0.52  | 1.18                        |
| RUSC1-AS1      | RUSC1 antisense RNA 1 [Homo sapiens]                            | -3.41                  | -0.55  | 1.18                        |
| LOC100129917   | Uncharacterized LOC100129917                                    | -1.35                  | 0.07   | 1.19                        |

|              |                                                                      |        |       |       |
|--------------|----------------------------------------------------------------------|--------|-------|-------|
| TTY14        | Testis-specific transcript, Y-linked 14                              | -1.97  | 0.01  | 1.23  |
| PCDHGB4      | Protocadherin gamma subfamily B, 4                                   | -1.08  | -0.32 | 1.29  |
| PCDHGB1      | protocadherin gamma subfamily B, 1                                   | -1.80  | -0.78 | 1.32  |
| THSD7A       | thrombospondin type 1 domain containing 7A                           | -5.96  | -3.80 | 1.36  |
| SETBP1       | SET binding protein 1                                                | -4.43  | -2.91 | 1.37  |
| PRH1-PRR4    | PRH1-PRR4 readthrough                                                | -1.99  | -0.19 | 1.39  |
| FSBP         | fibrinogen silencer binding protein                                  | -2.55  | -0.29 | 1.40  |
| LOC100507218 | RNF157 antisense RNA 1                                               | -1.93  | -0.14 | 1.41  |
| SRGAP2P2     | SLIT-ROBO Rho GTPase activating protein 2B                           | -3.52  | -1.77 | 1.42  |
| PCDHGB3      | protocadherin gamma subfamily B, 3                                   | -1.87  | -0.27 | 1.43  |
| HNF4A        | Hepatocyte nuclear factor 4 alpha                                    | -4.57  | -2.77 | 1.44  |
| TRPV4        | transient receptor potential cation channel subfamily V member 4     | -2.69  | -0.92 | 1.45  |
| SRGN         | serglycin                                                            | -1.08  | 0.35  | 1.46  |
| NUDT4P1      | Nudix hydrolase 4 pseudogene 1                                       | -1.77  | 1.01  | 1.54  |
| AJAP1        | Adherens junctions associated protein 1                              | -3.44  | -2.10 | 1.54  |
| PPM1H        | protein phosphatase, Mg <sup>2+</sup> /Mn <sup>2+</sup> dependent 1H | -5.38  | -3.28 | 1.56  |
| NPFF         | neuropeptide FF-amide peptide precursor                              | -1.97  | 0.35  | 1.58  |
| AP4S1        | Adaptor related protein complex 4 sigma 1 subunit                    | -2.98  | -0.87 | 1.66  |
| TNFSF18      | TNF superfamily member 18                                            | -3.29  | -0.36 | 1.68  |
| CTSL3        | ccathepsin L family member 3, pseudogene                             | -1.29  | 2.18  | 1.68  |
| CADPS2       | calcium dependent secretion activator 2                              | -4.68  | -2.61 | 1.78  |
| LOC100505549 | uncharacterized LOC100505549                                         | -2.83  | -0.99 | 1.80  |
| PDE4D        | phosphodiesterase 4D                                                 | -6.19  | -4.02 | 1.93  |
| LTB          | Lymphotoxin Beta                                                     | -2.52  | 0.11  | 1.96  |
| RBMS3        | RNA binding motif single stranded interacting protein 3              | -5.61  | -3.22 | 2.09  |
| PRDM5        | PR/SET domain 5                                                      | -3.55  | -1.29 | 2.10  |
| SAA2-SAA4    | SAA2-SAA4 readthrough                                                | -1.52  | 1.03  | 2.12  |
| C2orf82      | Chromosome 2 open reading frame 82                                   | -2.55  | 1.35  | 2.24  |
| RAB19        | RAB19, member RAS oncogene family                                    | -3.14  | 1.03  | 2.50  |
| LOC400927    | cTPTE and PTEN homologous inositol lipid phosphatase pseudogene      | -1.97  | 1.57  | 2.79  |
| IDH1-AS1     | IDH1 antisense RNA 1                                                 | -1.97  | 1.02  | 2.94  |
| SNURF        | SNRPN upstream reading frame                                         | -3.21  | 0.33  | 2.96  |
| SLC10A7      | solute carrier family 10 member 7                                    | -5.61  | -2.62 | 3.11  |
| KRTAP5-2     | keratin associated protein 5-2                                       | -4.21  | 0.72  | 3.98  |
| H3F3A        | H3 histone family member 3A                                          | -11.02 | -0.03 | 11.07 |
| CORO7-PAM16  | CORO7-PAM16 readthrough                                              | -14.60 | -3.11 | 11.70 |

|              |                                                                |        |       |       |
|--------------|----------------------------------------------------------------|--------|-------|-------|
| NPPA-AS1     | NPPA antisense RNA 1                                           | -14.59 | -2.21 | 12.06 |
| LOC100240734 | uncharacterized LOC100240734                                   | -14.50 | 0.74  | 12.63 |
| MYLK-AS1     | MYLK antisense RNA 1                                           | -15.03 | -0.51 | 13.41 |
| C20orf196    | chromosome 20 open reading frame 196                           | -14.87 | -0.60 | 13.97 |
| ZFP91-CNTF   | ZFP91-CNTF readthrough (NMD candidate)                         | -14.43 | 0.83  | 14.94 |
| RNF5         | ring finger protein 5                                          | -14.91 | -0.21 | 15.29 |
| CECR5-AS1    | HDHD5 antisense RNA 1                                          | -14.94 | 15.38 | 15.38 |
| LOC728066    | family with sequence similarity 133 member D, pseudogene       | -14.46 | 1.48  | 15.70 |
| RMRP         | RNA component of mitochondrial RNA processing endoribonuclease | -15.94 | 0.56  | 17.22 |
| RNU6ATAC     | RNA, U6atac small nuclear (U12-dependent splicing)             | -19.35 | -1.01 | 18.28 |

## Supplementary Figures

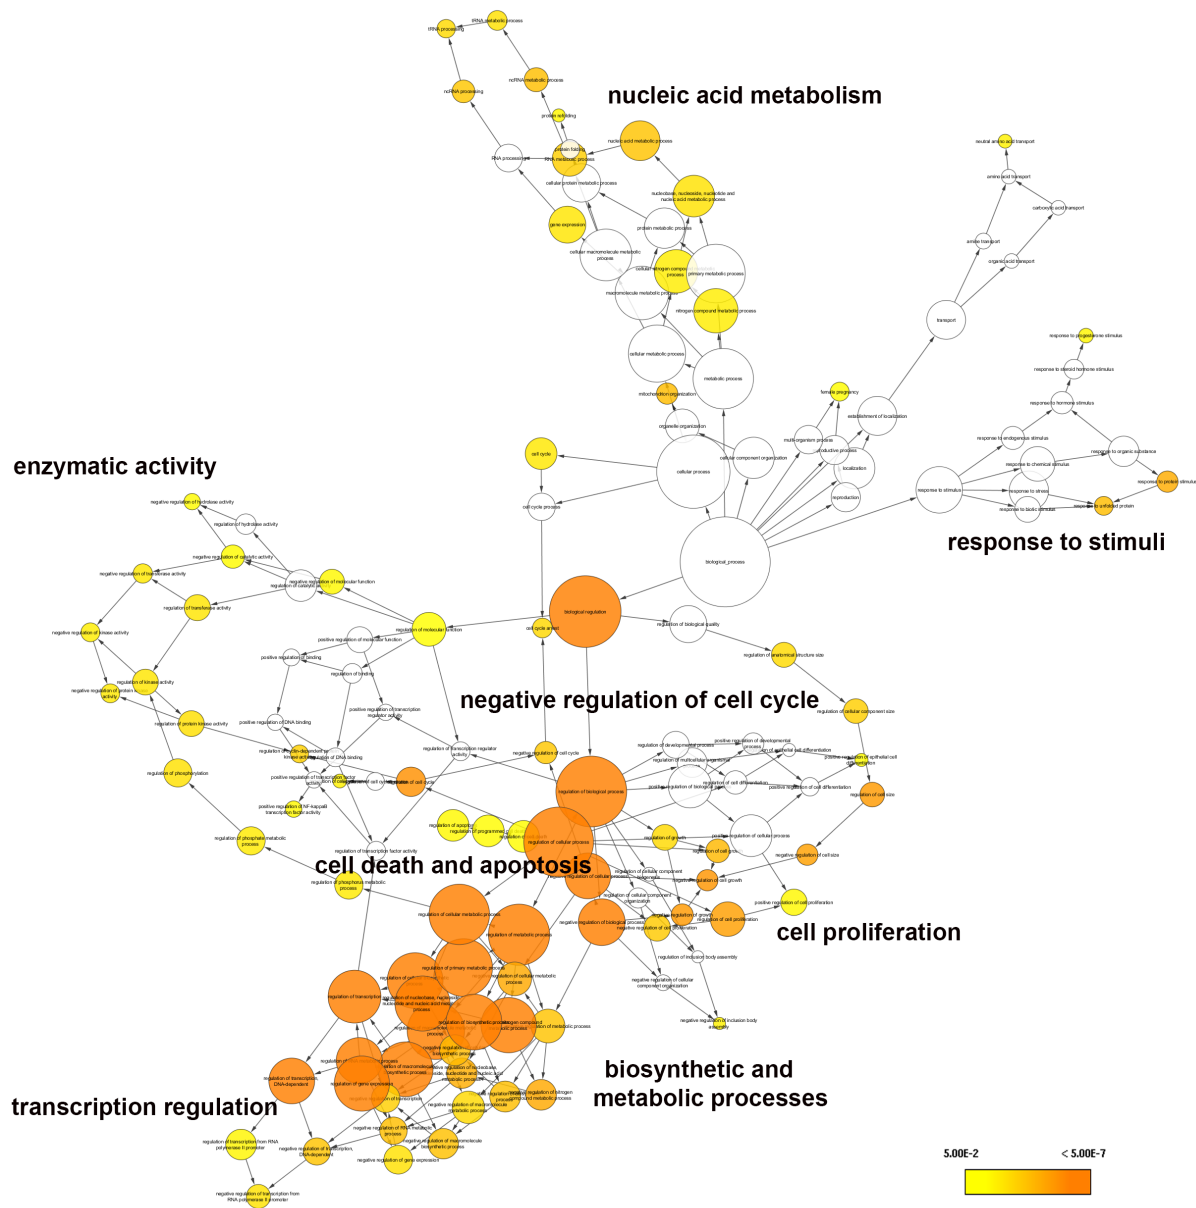

**Supplementary Figure 1.**

**BiNGO gene ontology analysis of the biological processes over-represented by the genes upregulated in cisplatin treated CD133<sup>+</sup> cells (n=964 genes) ( $p \leq 0.05$ , see the color bar). Node colors represent the statistical significance. The following biological processes were defined: nucleic acid metabolism, transcription regulation, response to stimuli, cell cycle and proliferation, regulation of enzymatic activities and cell death processes.**

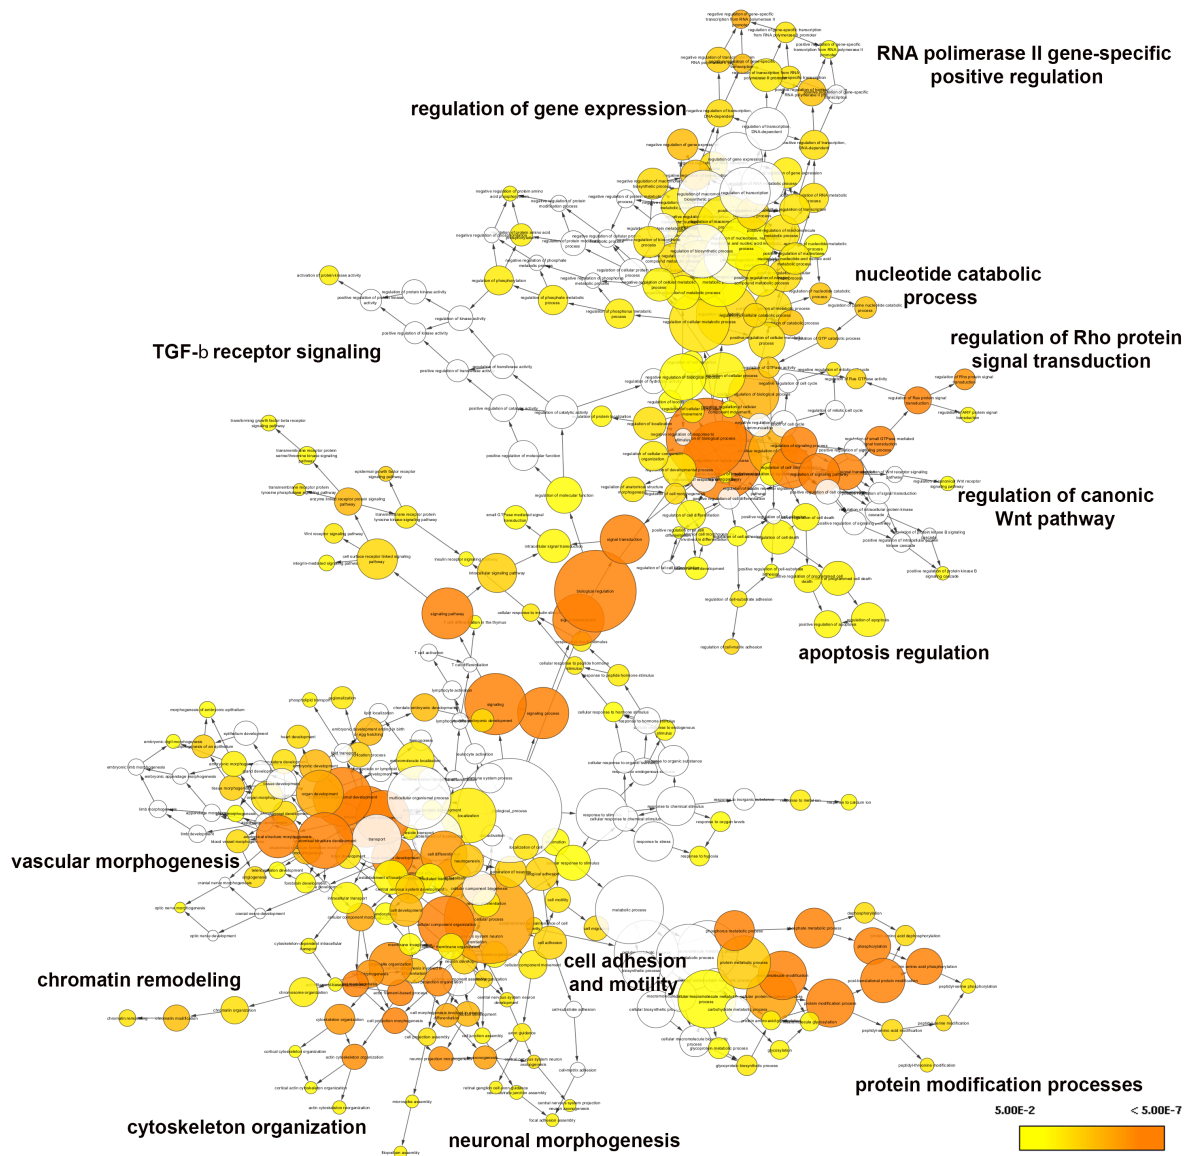

**Supplementary Figure 2.**

**BiNGO gene ontology analysis of the biological processes over-represented by the genes downregulated in cisplatin treated CD133<sup>+</sup> cells (n=1521 genes) ( $p \leq 0.05$ , see the color bar). Node colors represent the statistical significance. The following biological processes were overrepresented: gene expression, chromatin remodeling, nucleotide catabolic process, cytoskeleton organization, vascular and neuronal morphogenesis, cell motility and Rho signal transduction, canonic Wnt signaling and TGF-beta receptor signaling.**



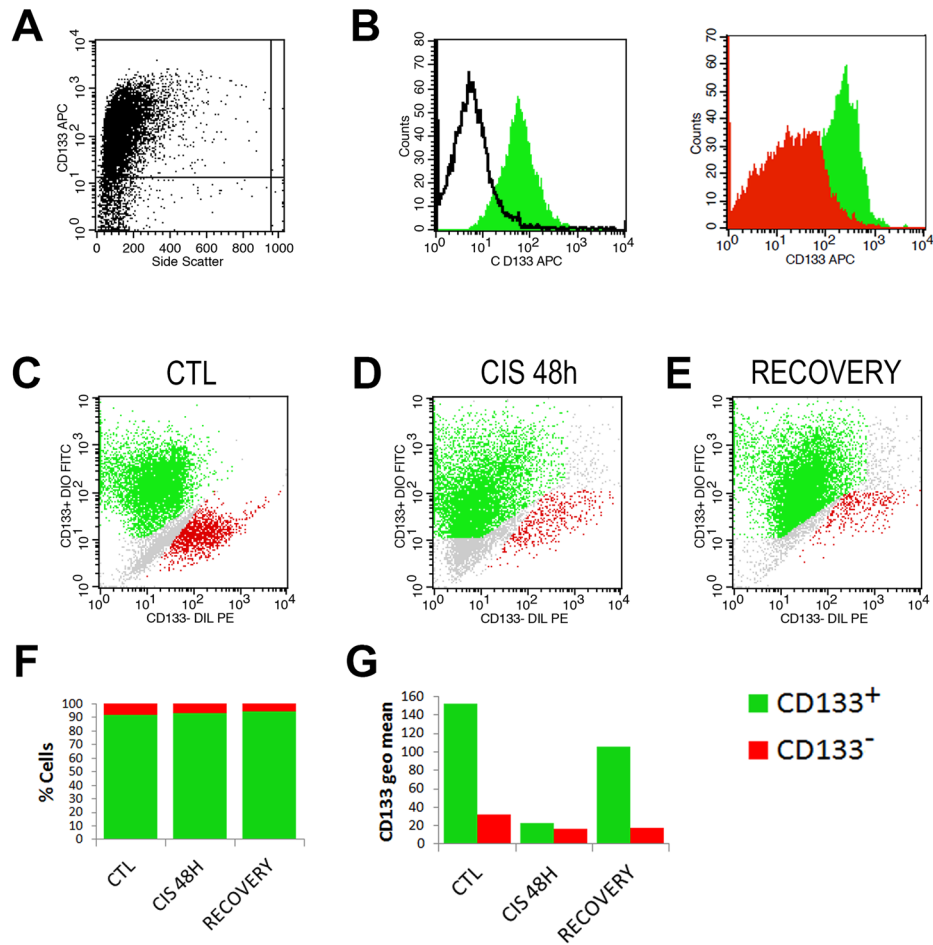

### Supplementary Figure 3.

Cytofluorimetric analysis of RPCs showing the percentage of cells expressing CD133 in basal conditions (A), and after immunomagnetical sorting (B). Green and red filled area shows CD133 expression in CD133<sup>+</sup> and CD133<sup>-</sup> cell fraction respectively. Black line shows isotype binding. C-E: Cytofluorimetric analysis showing CD133<sup>+</sup> (green) and CD133<sup>-</sup> (red) RPCs in basal conditions (CTL) (C), 48 hours (CIS 48H) (D) and seven days (RECOVERY) after cisplatin treatment (E). F: Ratio of the percentage of CD133<sup>+</sup> (green) and CD133<sup>-</sup> (red) RPCs in CTL), 48 hours (CIS 48H) and seven days (RECOVERY) after cisplatin treatment. G: Geometric mean of CD133-APC fluorescence intensity was measured in CD133<sup>+</sup> (green) and CD133<sup>-</sup> (red) RPCs (in single cultures) in basal conditions (CTL), 48 hours (CIS 48H) and seven days (RECOVERY) after cisplatin treatment.
